# Supplementary material
Source: PubMed Central journal article supplement (PMC6395907)
Supplement: AAC.01841-18-s0001.pdf [file AAC.01841-18-s0001.pdf]

## **Supplementary Materials and Methods**

### **1. Proteomic procedure**

#### **1.1. Protein extraction**

The protein preparation for the differential label-free proteomic analyses was performed as described previously (1). The biomass was treated with a lysis buffer (6 M guanidine HCl, 50 mM K<sub>2</sub>HPO<sub>4</sub>/KH<sub>2</sub>PO<sub>4</sub>, pH 8.5) followed by ultrasonication (3x10 s, 20% amplitude; U50 IKA Technik). 50 mg of extracted proteins were reduced and alkylated. The proteins were recovered by acetone precipitation and digested with 0.005% (w/v) trypsin (Promega V5111) in 25 mM (w/v) NH<sub>4</sub>HCO<sub>3</sub> (pH 8.5). The trypsin treatment was stopped by adding 0.1% formic acid (v/v).

#### **1.2. Separation of peptides**

Prior to mass spectrometry (MS) analysis, reverse phase chromatography was used to separate the extracts. The reverse-phase column (length 15 cm, diameter 75 mm, flow 300 nl/min; PepMap C18, Dionex) was equilibrated with 4% (v/v) acetonitrile for 20 min and peptide elution was carried out over an acetonitrile gradient from 4% to 35% (v/v) for 120 min. The separated peptides were then analyzed online by TripleTOF 5600 mass spectrometer (AB Sciex, USA).

#### **1.3. SWATH acquisition**

Peptide spectra were acquired in a data-dependent (DDA) and data-independent (DIA) acquisitions modes. The MS/MS library was acquired in the DDA mode and analyzed by ProteinPilot software (version 4.5, AB Sciex, USA) using the algorithm Paragon (version 4.5.0.0, AB Sciex, USA). Briefly, the trypsin was chosen as the cleavage specificity and alkylation (C) set to iodoacetamide, carbamidomethylation as fixed modifications, oxidation (M) and deamination (N, Q) as variable modifications were set. All biological modifications and amino acid substitutions were considered and a thorough ID search was applied with a peptide confidence set at 0.99. The raw spectral data

obtained served as the input for ProteinPilot against the Mycobacterium bovis Uniprot database. For the database search, the cut-off peptide confidence limit was set at 95%. ProteinPilot provided a global false discovery rate of 1% and a local false discovery rate of 5%. Accumulation time was set to 0.1 s for MS1 scan and 65 ms for MS2 scan, with total cycle time being approximately 3.8 s.

For the SWATH analysis (DIA, AB Sciex), 32 incremental steps defined as windows of 25 m/z containing 1 m/z for the overlap of window was passed over the full mass range (400–1250 m/z). Peak intensity method was used for the quantitation of peptides. The ion chromatogram of top six fragmented peptides was extracted, and their area was integrated over the 15 min on six transitions. The tolerance was set at 100 ppm. The SWATH data were processed with PeakView software (version 2.1.0.11041, AB Sciex, USA). The retention time (RT) was calculated manually from a group of 15 selected peptides with RT in the range of 20-100 min. Software MarkerView (version 1.2.1, AB Sciex, USA) was used for analysis of the relative abundance of the peptides. For all experiments, proteins identified with one peptide were rejected for interpretation.

## **Reference**

1. Deschoenmaeker F, Bayon-Vicente G, Sachdeva N, Depraetere O, Cabrera Pino JC, Leroy B, Muylaert K, Wattiez R. 2017. Impact of different nitrogen sources on the growth of *Arthrospira* sp. PCC 8005 under batch and continuous cultivation - A biochemical, transcriptomic and proteomic profile. *Bioresour Technol* 237:78-88.

## Supplementary Figures and Legends

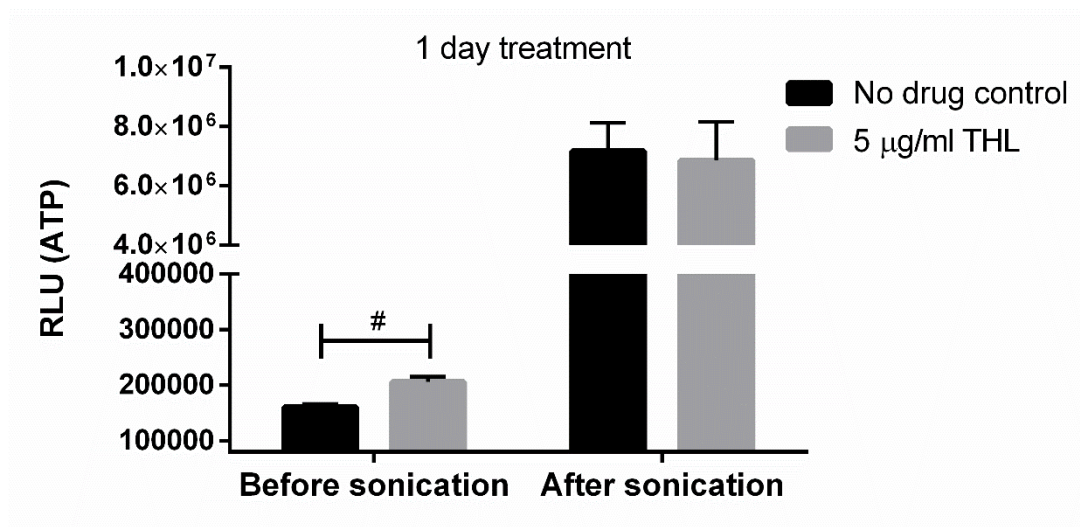

**Figure S1. THL did not increase mycobacterial ATP.** *M. bovis* BCG was treated with 5 µg/ml THL for 1 day and assessed for ATP both before and after sonication. #,  $p < 0.0001$  by unpaired t test. This experiment was performed twice, each in triplicate. Data from one representative experiment are shown. The error bar indicates standard deviation.

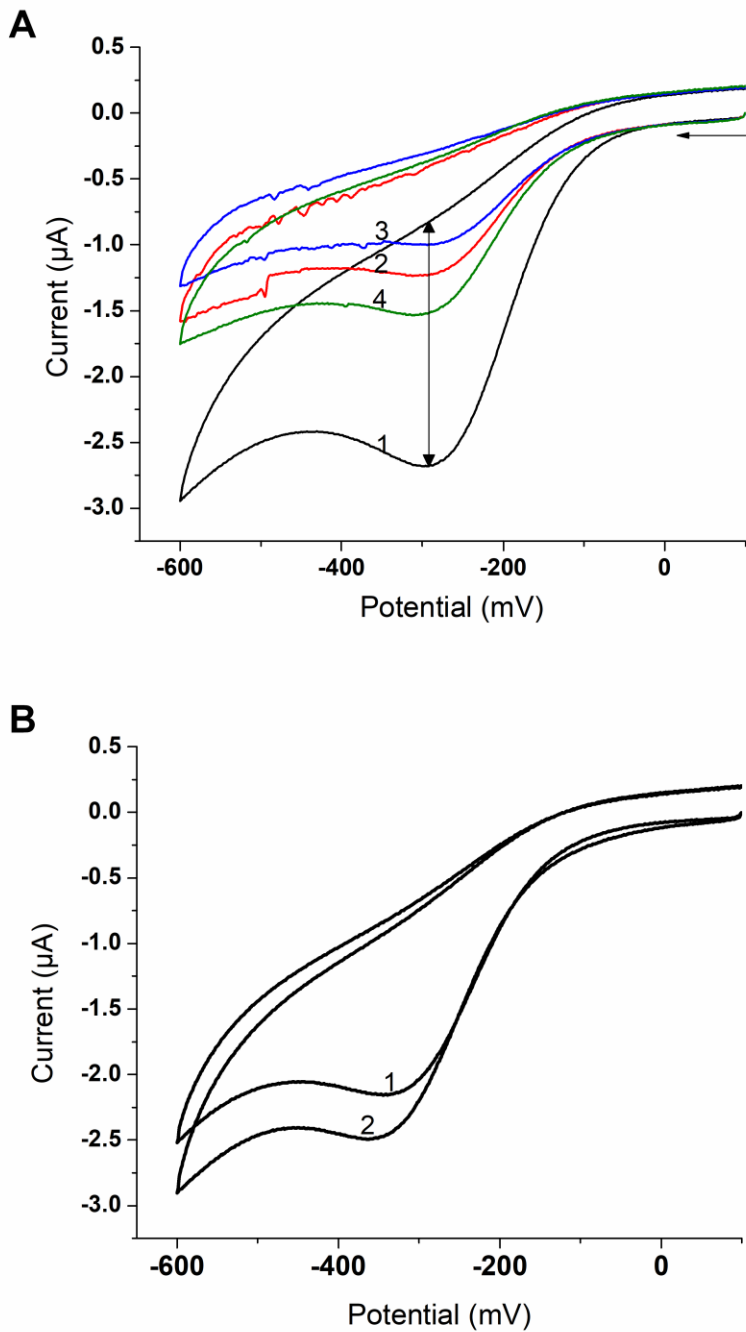

**Figure S2. Determination of oxygen content by cyclic voltammetry.** (A) Cyclic voltammetry analysis of oxygen content of fresh DTA medium (curve 1), *M. bovis* BCG culture (shaking for 5 hours, no drug control, curve 2), 0.4  $\mu\text{g/ml}$  INH-treated *M. bovis* BCG (5 hours, curve 3) and

bacteria treated with 0.2  $\mu\text{g/ml}$  rifampicin (5 hours, curve 4). The double-headed line reflects the intensity of the oxygen peak for curve 1, which indicates the initial oxygen content. (B) Cyclic voltammetry of oxygen content of 0.4  $\mu\text{g/ml}$  INH-treated *M. bovis* BCG culture before (curve 1) and after (curve 2) sample reoxygenation by tube opening and shaking. The experiments were performed 3 times and data from one representative experiment are shown.

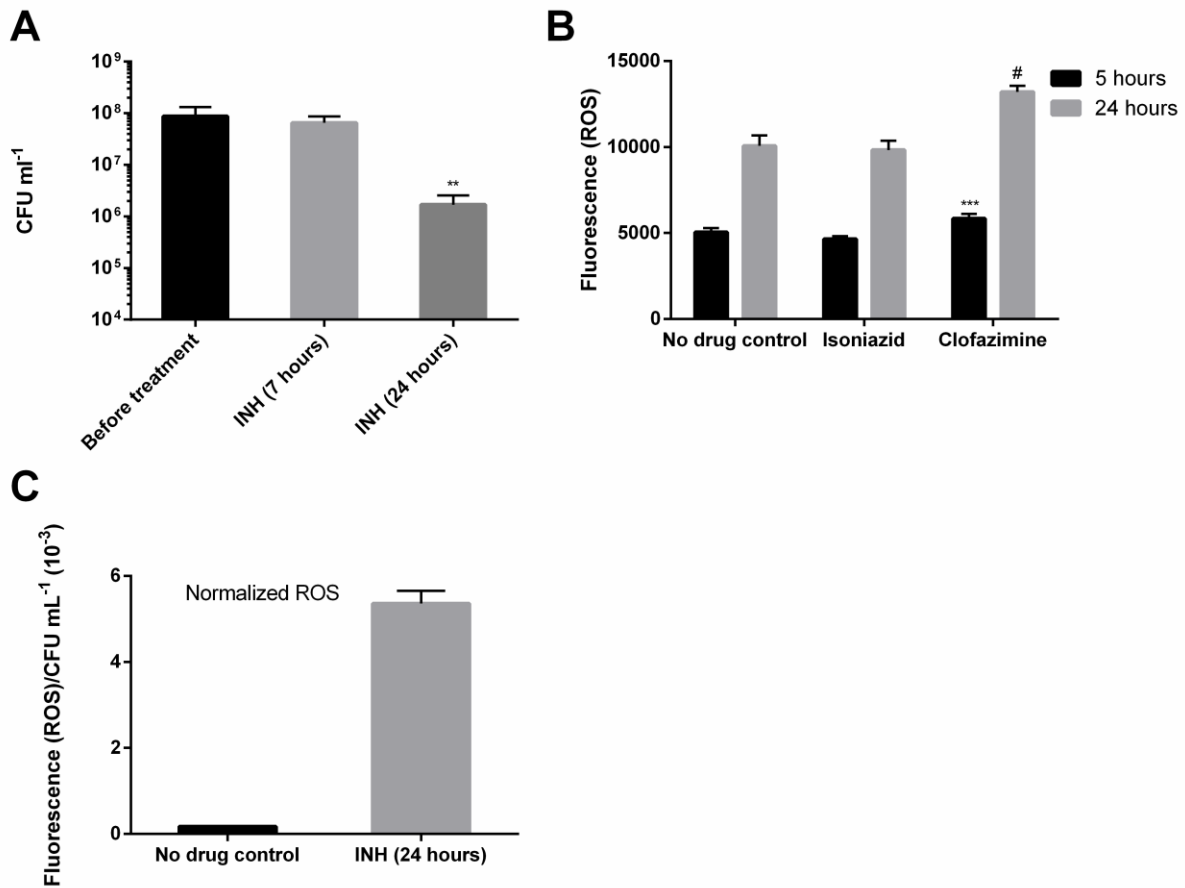

**Figure S3. ROS determination.** (A) WT *M. bovis* BCG was treated with 0.4  $\mu\text{g/ml}$  INH for 7 and 24 hours before viability determination. \*\*,  $p < 0.01$  relative to viability before treatment by unpaired t test. (B) ROS was measured after 5 and 24 hours of treatment with either 0.4  $\mu\text{g/ml}$  INH or 16  $\mu\text{g/ml}$  clofazimine. \*\*\* and #,  $p < 0.001$  and 0.0001 relative to no drug control by unpaired t test. (C) The ROS data was normalized by dividing by viability after 24 hours treatment with 0.4  $\mu\text{g/ml}$  INH. This experiment was performed twice, each in triplicate. Data from one representative experiment are shown. The error bar indicates standard deviation.

**A**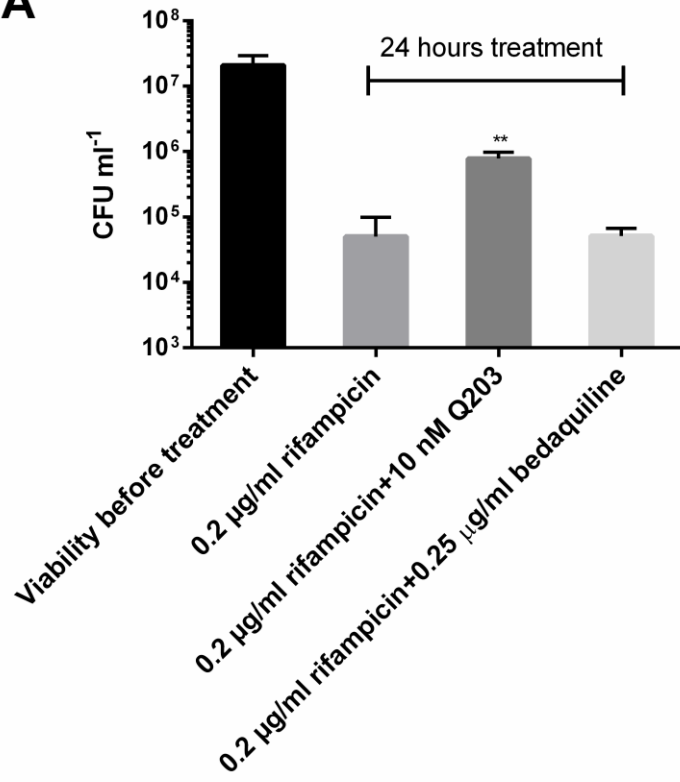**B**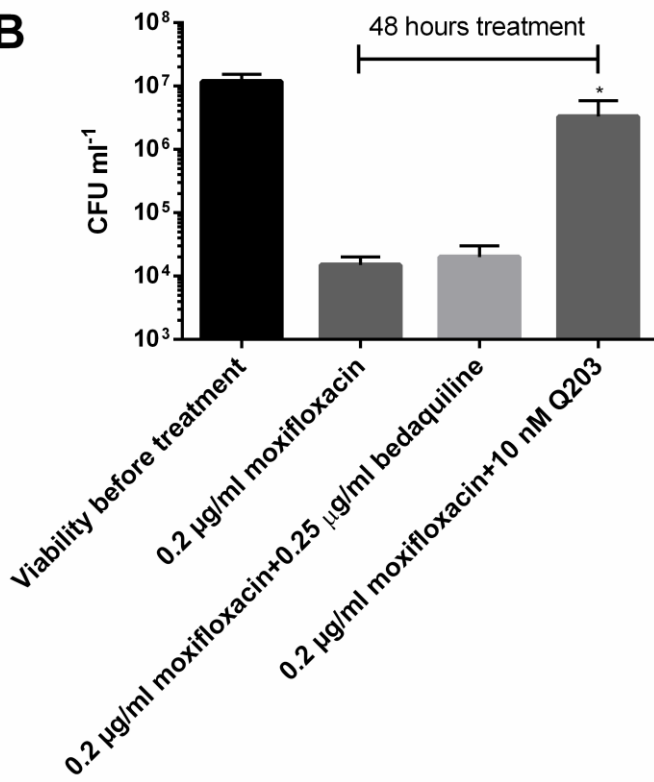

**Figure. S4. Q203 but not bedaquiline compromised the bactericidal activity of rifampicin and moxifloxacin.** (A) WT *M. bovis* BCG was treated with rifampicin ( $\pm$ Q203 or bedaquiline) for 1 day before viability determination. \*\*,  $p < 0.01$  relative to the rifampicin group by unpaired t test. (B) WT *M. bovis* BCG was treated with moxifloxacin ( $\pm$ Q203 or bedaquiline) for 2 days before viability determination. \*,  $p < 0.05$  relative to the moxifloxacin group by unpaired t test. This experiment was performed twice, each in triplicate. Data from one representative experiment are shown. The error bar indicates standard deviation.

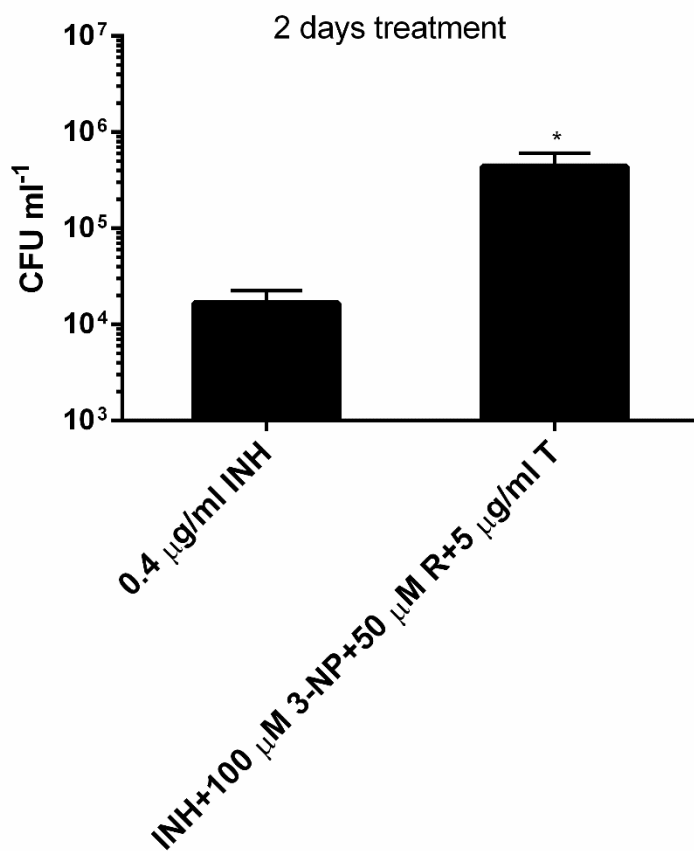

**Figure. S5. Lower concentrations of NDHs and SDHs inhibitors slightly protected mycobacteria from INH's killing.** WT *M. bovis* BCG cultures were treated with 0.4 µg/ml INH



( $\pm 100 \mu\text{M}$  3-NP,  $50 \mu\text{M}$  rotenone and  $5 \mu\text{g/ml}$  thioridazine) for 2 days before the viability determination. R and T denote rotenone and thioridazine, respectively. \*,  $p < 0.05$  by unpaired t test. This experiment was performed 3 times, each in triplicate. Data from one representative experiment are shown. The error bar indicates standard deviation.

## Supplementary Tables

**Table S1. Selected proteins with altered expression relative to no drug control after 7 hours treatment with 0.4 µg/ml INH**

| H37Rv locus*     | Name   | Description                                           | P-value <sup>a</sup> | Fold change <sup>#</sup><br>(INH/control) |
|------------------|--------|-------------------------------------------------------|----------------------|-------------------------------------------|
| Lipid metabolism |        |                                                       |                      |                                           |
| Rv0243           | FadA2  | 3-ketoacyl-CoA thiolase involved in lipid degradation | 0.00049              | 1.213665635                               |
| Rv3139           | FadE24 | acyl-CoA dehydrogenase                                | 0.01887              | 1.378313522                               |
| Rv3140           | FadE23 | acyl-CoA dehydrogenase                                | 0.0192               | 1.574635143                               |
| Rv0154c          | FadE2  | acyl-CoA dehydrogenase                                | 0.02625              | 0.587104126                               |
| Rv1193           | FadD36 | fatty-acid--CoA ligase; lipid degradation             | 0.03369              | 0.785317436                               |
| Rv2928           | TesA   | thioesterase; PDIM/PGL synthesis                      | 0.04854              | 0.727048845                               |

|                         |       |                                                                                        |         |             |
|-------------------------|-------|----------------------------------------------------------------------------------------|---------|-------------|
| Mycolic acid synthesis  |       |                                                                                        |         |             |
| Rv2247                  | AccD6 | acetyl-/propionyl-CoA carboxylase subunit beta; fatty acid (mycolic acid) biosynthesis | 0.00543 | 1.91036958  |
| Rv2243                  | FabD  | malonyl CoA-acyl carrier protein transacylase                                          | 0.0123  | 3.214445307 |
| Rv2246                  | KasB  | 3-oxoacyl-ACP synthase 2                                                               | 0.02386 | 1.469420587 |
| Rv2245                  | KasA  | 3-oxoacyl-ACP synthase 1                                                               | 0.02559 | 1.620538068 |
| (trans)membrane protein |       |                                                                                        |         |             |
| Rv0513                  | NA    | transmembrane protein                                                                  | 0.01188 | 1.343272489 |
| Rv2037c                 | NA    | Conserved transmembrane protein                                                        | 0.01803 | 0.204448975 |
| Rv1779c                 | NA    | integral membrane protein                                                              | 0.0239  | 2.946885124 |

|                       |      |                                                                                                        |         |             |
|-----------------------|------|--------------------------------------------------------------------------------------------------------|---------|-------------|
| Rv2203                | NA   | membrane protein                                                                                       | 0.03886 | 0.199758375 |
| Rv2721c               | NA   | Possible conserved<br>transmembrane<br>alanine and glycine<br>rich protein                             | 0.0452  | 1.608722976 |
| DNA/RNA<br>metabolism |      |                                                                                                        |         |             |
| Rv3221A               | RshA | anti-sigma factor;<br>Probably involved in<br>survival following<br>heat shock and<br>oxidative stress | 0.00148 | 0.259113456 |
| Rv3731                | LigC | DNA ligase C                                                                                           | 0.00252 | 4.912052855 |
| Regulator             |      |                                                                                                        |         |             |
| Rv1429                | NA   | PucR family<br>transcriptional<br>regulator                                                            | 0.00542 | 2.17147255  |
| Rv0757                | PhoP | two component<br>system response<br>transcriptional<br>positive regulator                              | 0.02149 | 0.780424496 |
| Others                |      |                                                                                                        |         |             |

|         |      |                                                                                             |         |             |
|---------|------|---------------------------------------------------------------------------------------------|---------|-------------|
| Rv1637c | NA   | MBL fold metallo-hydrolase by conserved domain                                              | 0.00101 | 0.284988496 |
| Rv2190c | NA   | endopeptidase                                                                               | 0.00312 | 0.233800776 |
| Rv0097  | NA   | oxidoreductase; taurine catabolism dioxygenase                                              | 0.01607 | 21.33419521 |
| Rv3614c | EspD | ESX-1 secretion-associated protein                                                          | 0.02145 | 1.895233455 |
| Rv3670  | EphE | epoxide hydrolase involved in detoxification reactions following oxidative damage to lipids | 0.02301 | 0.498562464 |
| Rv2633c | NA   | hemerythrin domain-containing protein (oxygen transport?)                                   | 0.03147 | 1.742590203 |
| Rv1589  | BioB | biotin synthetase involved in biotin synthesis                                              | 0.03338 | 0.480737678 |
| Rv2537c | AroD | 3-dehydroquinate dehydratase involved                                                       | 0.04819 | 0.348749772 |

|  |  |                               |  |  |
|--|--|-------------------------------|--|--|
|  |  | in chorismate<br>biosynthesis |  |  |
|--|--|-------------------------------|--|--|

\*, The proteomic analysis was performed with *M. bovis* BCG. To locate corresponding homology proteins in *M. tuberculosis* H37Rv, NCBI protein blast (<https://blast.ncbi.nlm.nih.gov/Blast.cgi?PAGE=Proteins>) was used. a, only proteins with a p-value of <0.05 were analyzed. #, only proteins with a fold change of <0.8 or >1.2 were analyzed.

**Table S2. Selected proteins with altered expression relative to INH after 7 hours treatment with Q203 plus INH**

| H37Rv locus*        | Name   | Description                                         | P-value <sup>a</sup> | Fold change <sup>#</sup><br>(Q203 plus<br>INH /INH) |
|---------------------|--------|-----------------------------------------------------|----------------------|-----------------------------------------------------|
| Lipid<br>metabolism |        |                                                     |                      |                                                     |
| Rv3130c             | Tgs1   | diacylglycerol O-<br>acyltransferase                | 0.00306              | 1.400794483                                         |
| Rv2931              | PpsA   | phthiocerol synthesis<br>polyketide synthase type I | 0.00843              | 0.681145818                                         |
| Rv2247              | AccD6  | acetyl-/propionyl-CoA<br>carboxylase subunit beta   | 0.01593              | 0.675351232                                         |
| Rv2950c             | FadD29 | long-chain-fatty-acid--AMP<br>ligase                | 0.01976              | 0.715231894                                         |
| Rv2246              | KasB   | 3-oxoacyl-ACP synthase 2                            | 0.03162              | 0.72384135                                          |
| Rv2930              | FadD26 | fatty-acid--CoA ligase                              | 0.03427              | 0.61693415                                          |
| Rv2243              | FabD   | malonyl CoA-acyl carrier<br>protein transacylase    | 0.0411               | 0.608302157                                         |
| Rv2933              | PpsC   | phthiocerol synthesis<br>polyketide synthase type I | 0.04313              | 0.762018148                                         |
| Rv2524c             | Fas    | fatty acid synthase                                 | 0.0475               | 0.689531479                                         |

|                    |      |                                                                                                                                             |         |             |
|--------------------|------|---------------------------------------------------------------------------------------------------------------------------------------------|---------|-------------|
| Rv2483c            | PlsC | bifunctional L-3-phosphoserine phosphatase/1-acyl-sn-glycerol-3-phosphate acyltransferase; involved in phospholipid and serine biosynthesis | 0.04794 | 1.517658617 |
| Metabolic pathways |      |                                                                                                                                             |         |             |
| Rv0097             | NA   | oxidoreductase; taurine catabolism dioxygenase                                                                                              | 0.01514 | 0.047145124 |
| Rv2503c            | ScoB | succinyl-CoA:3-ketoacid-CoA transferase subunit B; succinyl-CoA + a 3-oxo acid = succinate + a 3-oxo-acyl-CoA                               | 0.01548 | 2.29533991  |
| Rv3319             | SdhB | succinate dehydrogenase iron-sulfur protein subunit                                                                                         | 0.01975 | 1.277809719 |
| Rv0211             | PckA | phosphoenolpyruvate carboxykinase                                                                                                           | 0.02199 | 1.308747283 |
| Rv3432c            | GadB | glutamate decarboxylase, catalyzing the production of GABA                                                                                  | 0.04877 | 1.693843265 |



|                         |        |                                                                                                                                                    |         |             |
|-------------------------|--------|----------------------------------------------------------------------------------------------------------------------------------------------------|---------|-------------|
| Rv2447c                 | FolC   | folylpolyglutamate synthase                                                                                                                        | 0.04896 | 1.823512674 |
| Stress tolerance        |        |                                                                                                                                                    |         |             |
| Rv1636                  | TB15.3 | iron-regulated universal stress protein                                                                                                            | 0.01705 | 5.893120602 |
| Rv0186A                 | MymT   | metallothionein; coordinates Cu(I) ions into a Cu(I)-thiolate core; protects cell from copper toxicity                                             | 0.01798 | 4.0493237   |
| Rv3841                  | BfrB   | bacterioferritin; involved in iron storage; ferritin is an intracellular molecule that stores iron in a soluble, nontoxic, readily available form. | 0.02415 | 1.839171396 |
| (trans)membrane protein |        |                                                                                                                                                    |         |             |
| Rv1410c                 | NA     | aminoglycosides/tetracycline-transport integral membrane protein; MFS-type drug efflux transporter P55                                             | 0.0047  | 3.785172145 |
| Rv1363c                 | NA     | membrane protein                                                                                                                                   | 0.01318 | 1.582604441 |

|                            |      |                                                                                                                             |         |             |
|----------------------------|------|-----------------------------------------------------------------------------------------------------------------------------|---------|-------------|
| Rv3921c                    | YidC | membrane protein insertase;<br>Probable conserved<br>transmembrane protein                                                  | 0.02647 | 1.215279175 |
| Rv2203                     | NA   | membrane protein                                                                                                            | 0.04113 | 5.121286615 |
| DNA/RNA<br>metabolism      |      |                                                                                                                             |         |             |
| Rv2024c                    | NA   | hypothetical protein; DNA<br>endonuclease or helicase by<br>conserved domain                                                | 0.0202  | 0.688502482 |
| Rv1020                     | Mfd  | transcription-repair coupling<br>factor involved in nucleotide<br>excision repair; necessary for<br>strand-specific repair. | 0.03014 | 0.550694931 |
| Rv3211                     | RhlE | ATP-dependent RNA<br>helicase                                                                                               | 0.03049 | 0.577395926 |
| Rv2703                     | SigA | RNA polymerase sigma<br>factor                                                                                              | 0.03401 | 0.558599797 |
| Regulator/sensor<br>kinase |      |                                                                                                                             |         |             |
| Rv3291c                    | LrpA | transcriptional regulator                                                                                                   | 0.00922 | 0.608085908 |
| Rv1429                     | NA   | PucR family transcriptional<br>regulator                                                                                    | 0.014   | 0.358270123 |

|         |      |                                                                                                                                                 |          |             |
|---------|------|-------------------------------------------------------------------------------------------------------------------------------------------------|----------|-------------|
| Rv0117  | OxyS | oxidative stress response<br>regulatory protein                                                                                                 | 0.01697  | 14.07978108 |
| Others  |      |                                                                                                                                                 |          |             |
| Rv0061c | NA   | hypothetical protein                                                                                                                            | 2.12E-05 | 5.962587805 |
| Rv3290c | Lat  | L-lysine-epsilon<br>aminotransferase; catalytic<br>activity: L-lysine + 2-<br>oxoglutarate = 2-<br>aminoadipate 6-semialdehyde<br>+ L-glutamate | 0.00049  | 2.6780465   |
| Rv2031c | HspX | alpha-crystallin                                                                                                                                | 0.00145  | 1.282273248 |
| Rv3241c | NA   | ribosomal subunit interface<br>protein; ribosome hibernation<br>promotion factor                                                                | 0.00305  | 2.620505432 |
| Rv2964  | PurU | formyltetrahydrofolate<br>deformylase involved in<br>purine biosynthesis                                                                        | 0.00971  | 0.256657936 |
| Rv3768  | NA   | nuclear transport factor 2<br>family protein                                                                                                    | 0.01598  | 1.901407129 |
| Rv0125  | PepA | serine protease                                                                                                                                 | 0.01978  | 1.290189841 |
| Rv3293  | Pcd  | piperidine-6-carboxylic acid<br>dehydrogenase involved in L-                                                                                    | 0.03284  | 1.383134105 |

|         |       |                                                                                    |         |             |
|---------|-------|------------------------------------------------------------------------------------|---------|-------------|
|         |       | alpha-aminoadipic acid synthesis with Lat protein                                  |         |             |
| Rv2911  | DacB2 | penicillin-binding protein involved in peptidoglycan synthesis                     | 0.03628 | 8.002129874 |
| Rv2697c | Dut   | deoxyuridine 5'-triphosphate nucleotidohydrolase involved in nucleotide metabolism | 0.03753 | 2.475979793 |
| Rv1299  | PrfA  | peptide chain release factor                                                       | 0.04403 | 0.755629208 |
| Rv0505c | SerB1 | phosphoserine phosphatase                                                          | 0.04958 | 1.450477053 |

\*, The proteomic analysis was performed with *M. bovis* BCG. To locate corresponding homology proteins in *M. tuberculosis* H37Rv, NCBI protein blast (<https://blast.ncbi.nlm.nih.gov/Blast.cgi?PAGE=Proteins>) was used. a, only proteins with a p-value of <0.05 were analyzed. #, only proteins with a fold change of <0.8 or >1.2 were analyzed.
